# Supplementary material
Source: publisher site journal article supplement (https://www.spandidos-publications.com/8251/downloadSupplementary)
Supplement: Supplementary file [file downloadSupplementary]

**Table S1.** Sequences of primers used in reverse transcription-quantitative PCR.

| <b>Gene name</b> | <b>Primer sequence, 5'-3'</b> |
|------------------|-------------------------------|
| COL2A1           | F: CCCCAGGTTGACAAAG           |
|                  | R: AGGGATTCCATTAGAGCC         |
| IL-1 $\beta$     | F: TCTGTGACTCGTGGGA           |
|                  | R: TGTTGGCTTATGTTCTGT         |
| IL-6             | F: AGTTCCGTTTCTACCTG          |
|                  | R: TCCTTAGCCACTCCTT           |
| DUSP26           | F: CTC AACGCCTCCCACAG         |
|                  | R: CTC ACTCCCACCGCACA         |
| COL1A1           | F: CGAGTATGGAAGCGAAGGT        |
|                  | R: CCACAAGCGTGCTGTAGGT        |
| TNF- $\alpha$    | F: TTCTCATTCTGCTCGTGG         |
|                  | R: CCTCCGCTTGGTGGTTT          |
| HDAC1            | F: GTTCTTGCGTTCTATTCTG        |
|                  | R: GTCCGTCTGCTGCTTAT          |
| HDAC2            | F: GGATGGAGAAGACCCTG          |
|                  | R: CGACATTCCTACGACCT          |
| HDAC8            | F: CCAGAAGGTCAGCCAAGA         |
|                  | R: TTTCCGTCGCAATCGTA          |
| $\beta$ -actin   | F: TGGCACCACACTTTCTACAATGAGC  |
|                  | R: GGGTCATCTTTTCACGGTTGG      |

COL2A1, type II collagen; IL, interleukin; DUSP26, dual-specificity phosphatase 26; COL1A1, type I collagen; HDAC, histone deacetylase; F, forward; R, reverse.
